# Supplementary material for: A global catalogue of CO 2 emissions and co-emitted species from power plants, including high-resolution vertical and temporal profiles
Source: Copernicus journal article supplement (doi:10.5194/essd-16-337-2024), 2024-01-15
Supplement: Supplementary file 1 [file essd-16-337-2024-supplement.pdf]

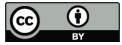

*Supplement of*

## **A global catalogue of CO<sub>2</sub> emissions and co-emitted species from power plants, including high-resolution vertical and temporal profiles**

**Marc Guevara et al.**

*Correspondence to:* Marc Guevara ([marc.guevara@bsc.es](mailto:marc.guevara@bsc.es))

The copyright of individual parts of the supplement might differ from the article licence.

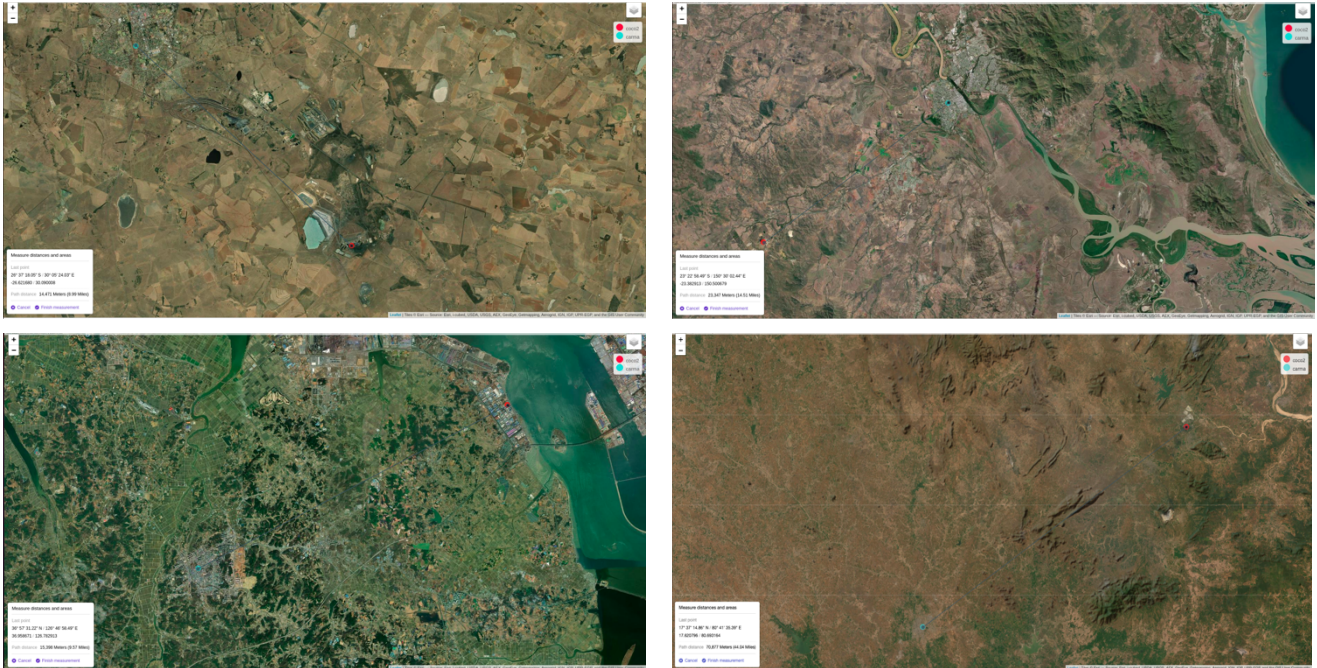

5 **Figure S1. Comparison between the geographical location reported by the present catalogue (red points) and CARMAv3 (blue points) for selected power plants, including Camden (South Africa), Stanwell (Australia), Dangjin (South Korea) and Kothagudem (India). The windows on the low left corner indicates the distance (m) between geographical locations for each cases. Tiles © Esri — Source: Esri, i-cubed, USDA, USGS, AEX, GeoEye, Getmapping, Aerogrid, IGN, IGP, UPR-EGP, and the GIS User Community.**

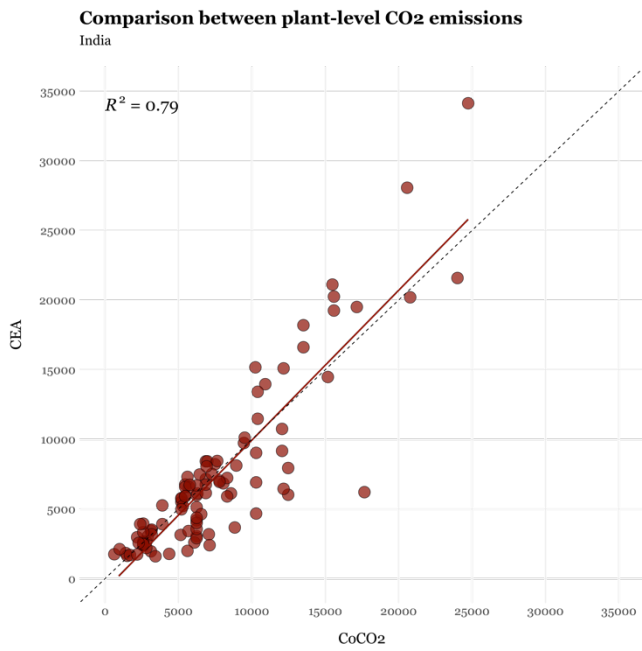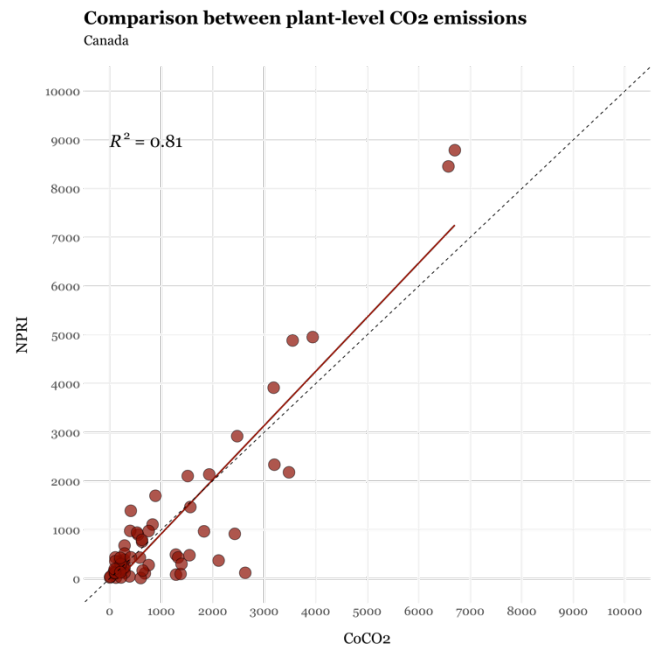

**Figure S2. Plant-to-plant CO<sub>2</sub> annual emission comparison between top 100 emitters reported by this work and CEA for India and NPRI for Canada, respectively (dashed line represents the 1:1 line).**
